# Supplementary material for: Author Correction: Single-cell transcriptomics identifies Mcl-1 as a target for senolytic therapy in cancer
Source: PubMed Central journal article supplement (PMC10359282; doi:10.1038/s41467-023-40080-9), 2023-07-20
Supplement: 41467_2023_40080_MOESM2_ESM.pdf [file 41467_2023_40080_MOESM2_ESM.pdf]

# Figure 4c 3 biological replicates

Experiment 1 2020.12.08

Vehicle

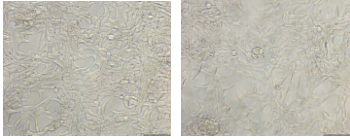

Docetaxel

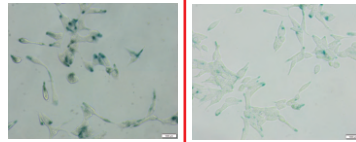

Used in paper

Docetaxel S63845

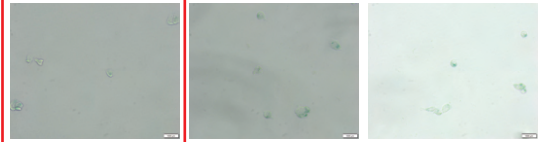

Used in paper

Docetaxel ABT263

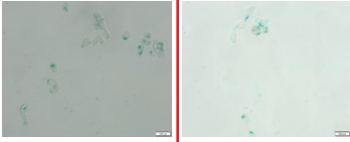

Used in paper

Palbociclib

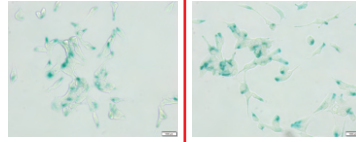

Used in paper

Palbociclib S63845

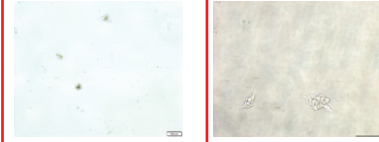

Used in paper

Palbociclib ABT263

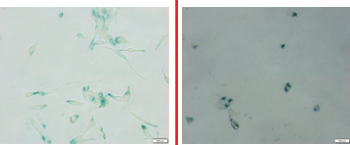

Used in paper

Experiment 2 2021.01.13

Vehicle

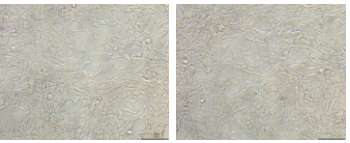

Docetaxel

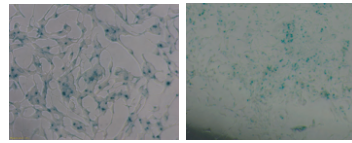

Docetaxel S63845

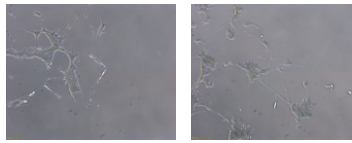

Docetaxel ABT263

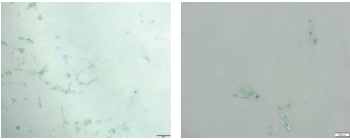

Palbociclib

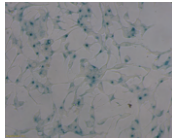

Palbociclib S63845

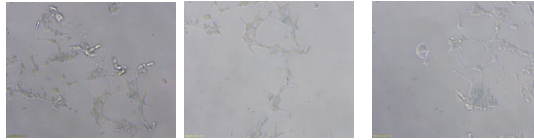

Palbociclib ABT263

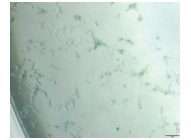

Experiment 3 2021.01.18

Vehicle

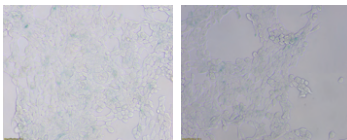

Docetaxel

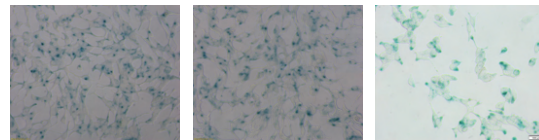

Docetaxel S63845

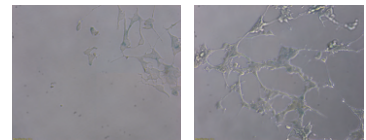

Docetaxel ABT263

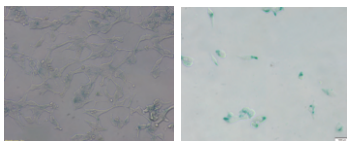

Palbociclib

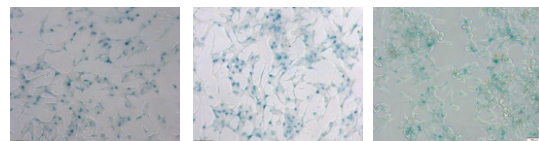

Palbociclib S63845

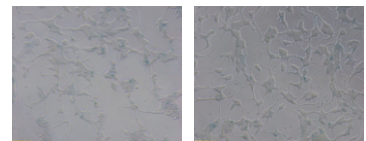

Palbociclib ABT263

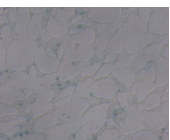

# Supplementary Figure 8c Mice sacrificed at 2021.10.25

Biological replicates done with different mice. Staining performed on the same day  
ID number of each mice is showed as label of each image

p16

**Vehicle**  
14039  
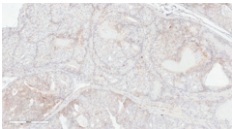  
Used in paper

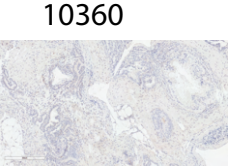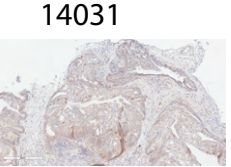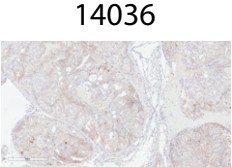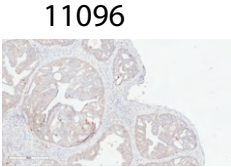

**Docetaxel**  
14038  
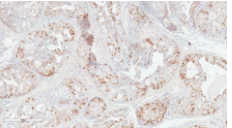  
Used in paper

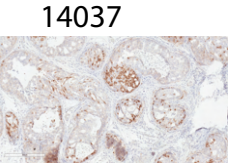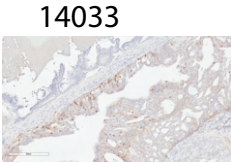

**Docetaxel ABT263**  
14034  
  
Used in paper

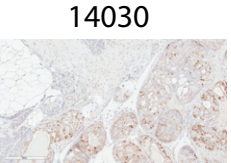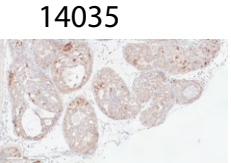

**Docetaxel S63845**  
14028  
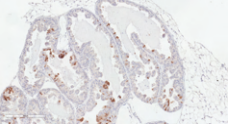  
Used in paper

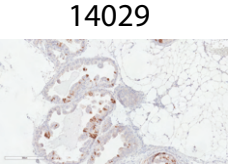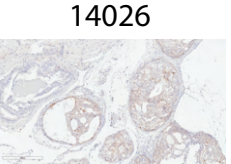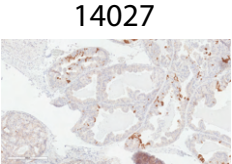

# Supplementary Figure 8

Mice sacrificed at 2021.10.25 Biological replicates done with different mice. Staining performed on the same day ID number of each mice is showed as label of each image

## Cleaved Caspase 3

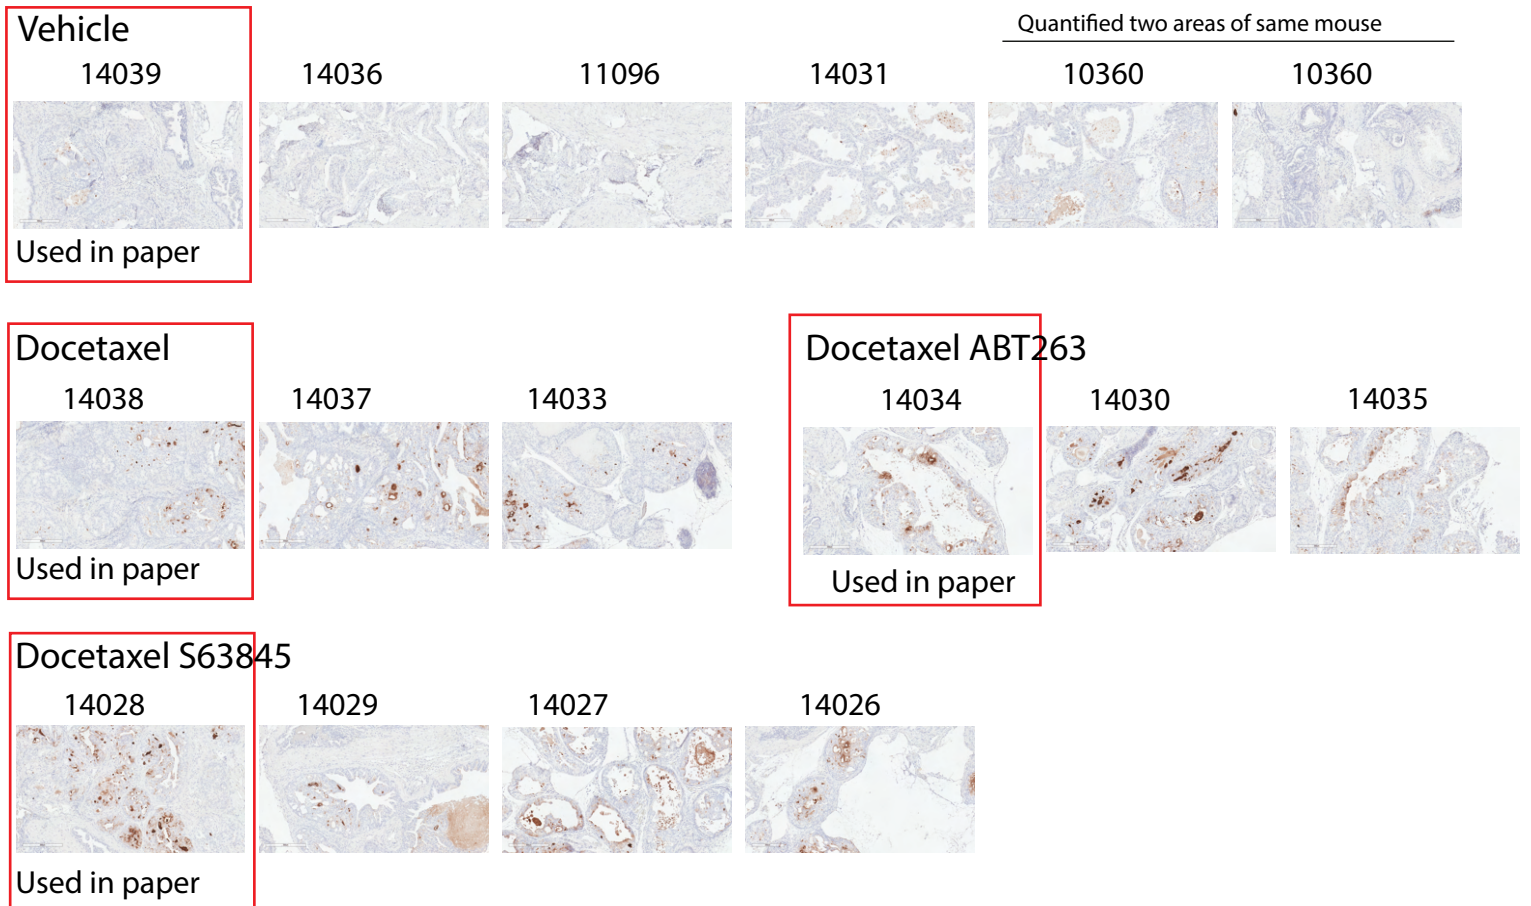

## KI67

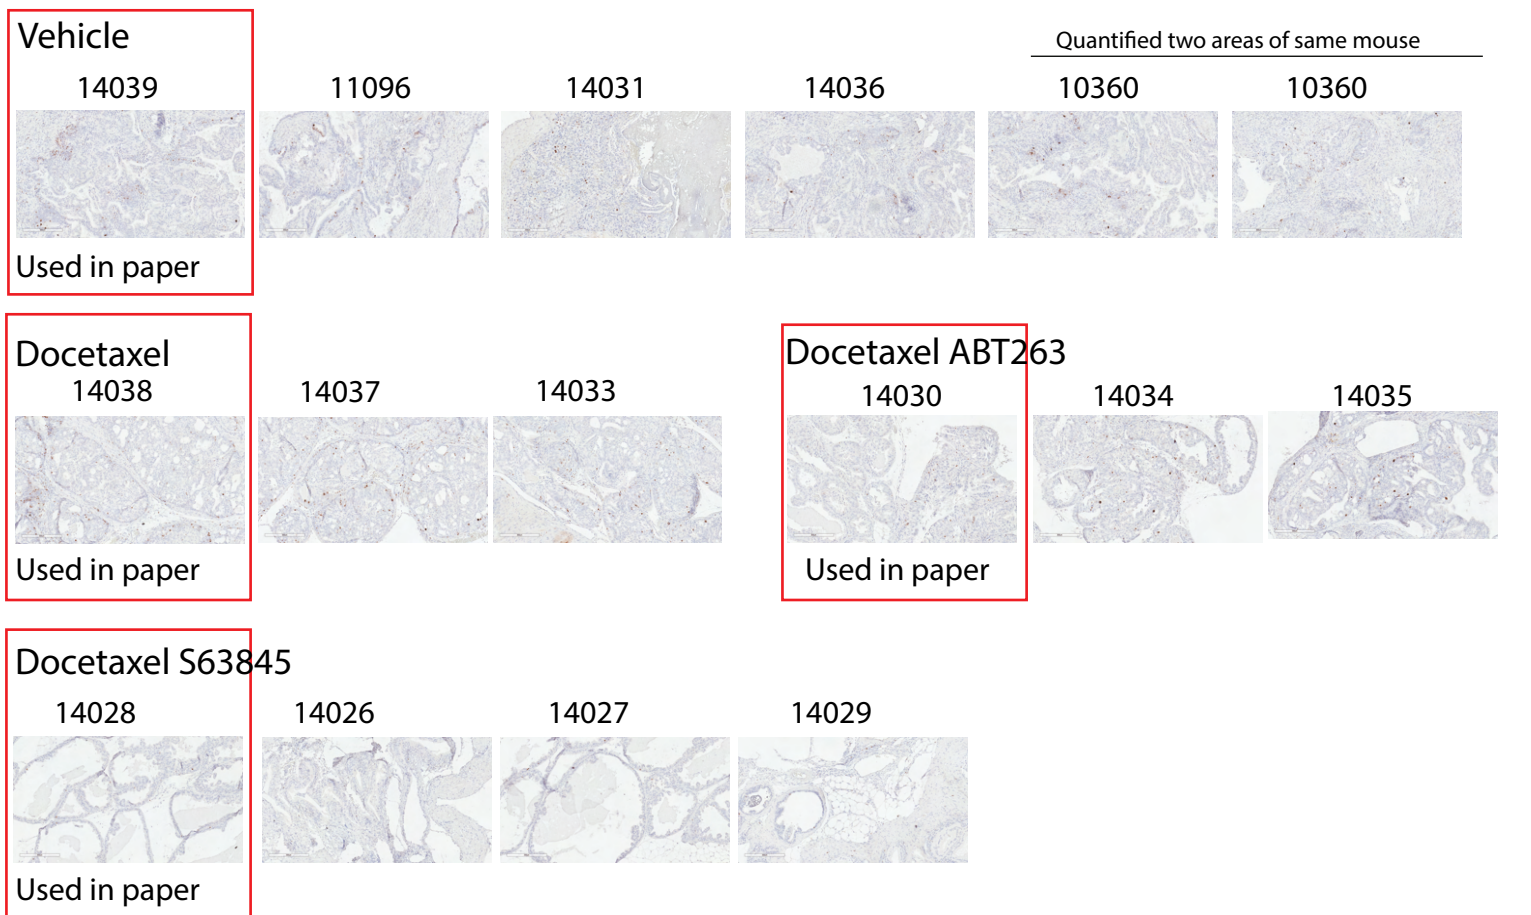

# Supplementary Figure 8f

Mice sacrificed at 2021.10.25 Biological replicates done with different mice. Staining performed on the same day  
ID number of each mice is showed as label of each image

## F4/80 (macrophages)

### Vehicle

Quantified two areas of same mouse

14039

14036

11096

14031

10360

10360

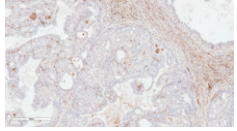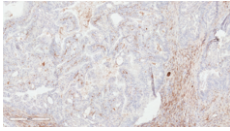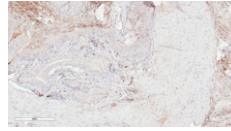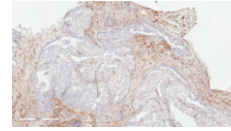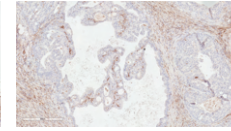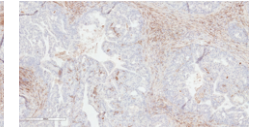

Used in paper

### Docetaxel

14038

14033

14041

14037

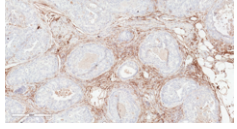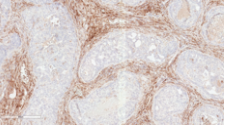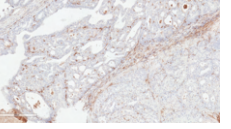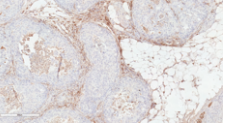

Used in paper

### Docetaxel S63845

14028

14029

14026

14044

14027

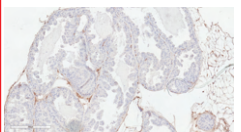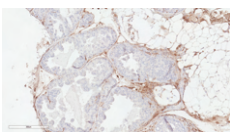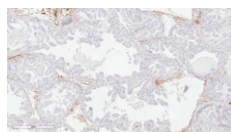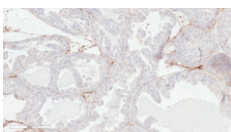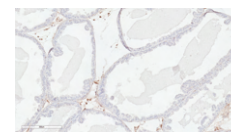

Used in paper

### Docetaxel ABT263

14034

14030

14035

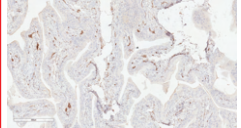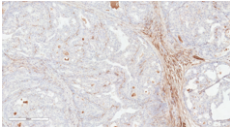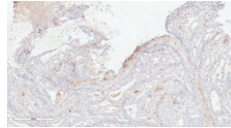

Used in paper

## GR1 (MDSCs)

### Vehicle

Quantified two areas of same mouse

14039

14031

14036

11096

10360

10360

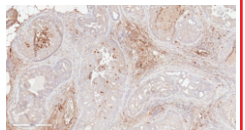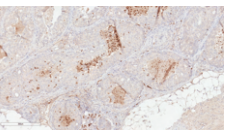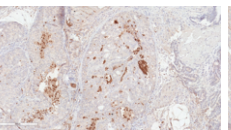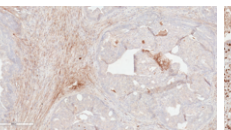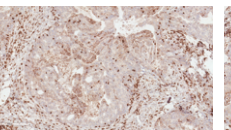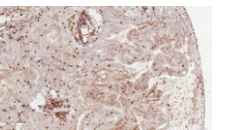

Used in paper

### Docetaxel

14038

14033

14041

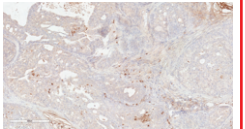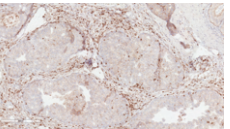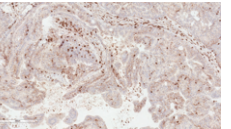

Used in paper

### Docetaxel S63845

14029

14028

14026

14027

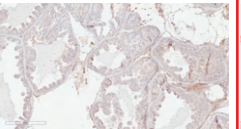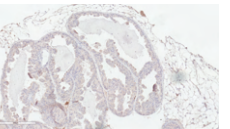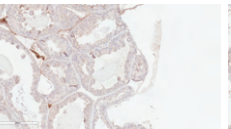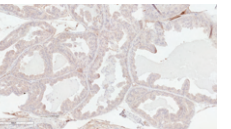

Used in paper

### Docetaxel ABT263

14035

14034

14030

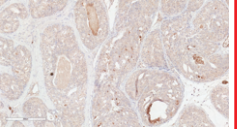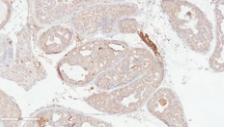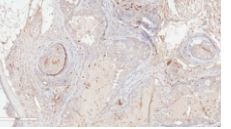

Used in paper
